# Supplementary material for: Titanium doped niobium oxide for stable pseudocapacitive lithium ion storage and its application in 3 V non-aqueous supercapacitors
Source: Royal Society of Chemistry journal article supplement (doi:10.1039/c5ta04776e), 2015-01-01
Supplement: c5ta04776e1.pdf [file c5ta04776e1.pdf]

Supporting Information

**Titanium Doped Niobium Oxide for Stable Pseudocapacitive Lithium Ion Storage and Its Application for 3 V Non-Aqueous Supercapacitor**

*Xu Wang, Pooi See Lee\**

Dr. X.Wang, Prof. P.S. Lee.

School of Materials Science and Engineering, Nanyang Technological University, 639798, Singapore.

E-mail:pslee@ntu.edu.sg

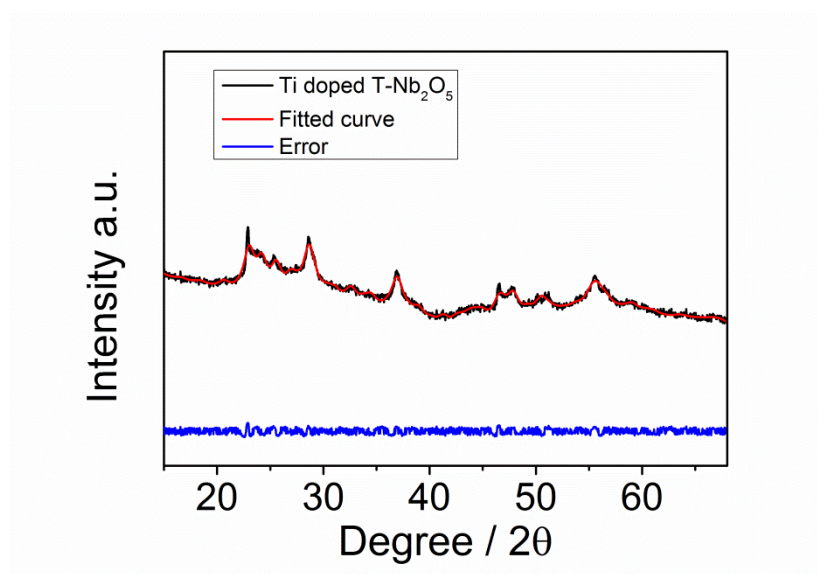

**Figure S1.** XRD fitting of Ti doped T-Nb<sub>2</sub>O<sub>5</sub> diffraction pattern from 15° to 68° using Rietveld refinement analysis in TOPAS software version 4.1.

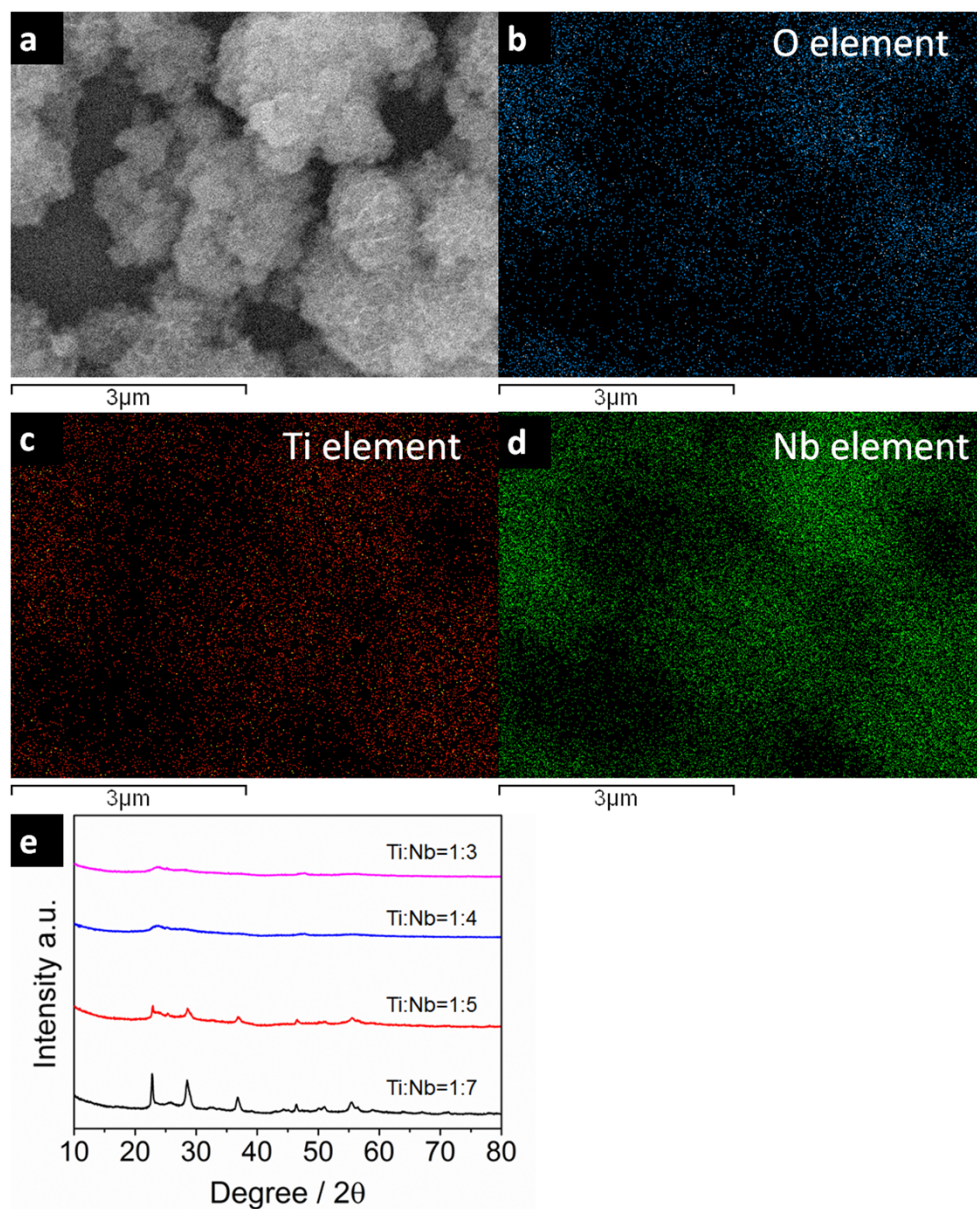

**Figure S2.** (a) SEM image of the mapping area of Ti doped T-Nb<sub>2</sub>O<sub>5</sub> sample; (b) O element mapping; (c) O element mapping; (d) O element mapping.EDX spectrum of sample Ti doped T-Nb<sub>2</sub>O<sub>5</sub>; (d) XRD patterns of samples with different starting Ti:Nb molar ratio.

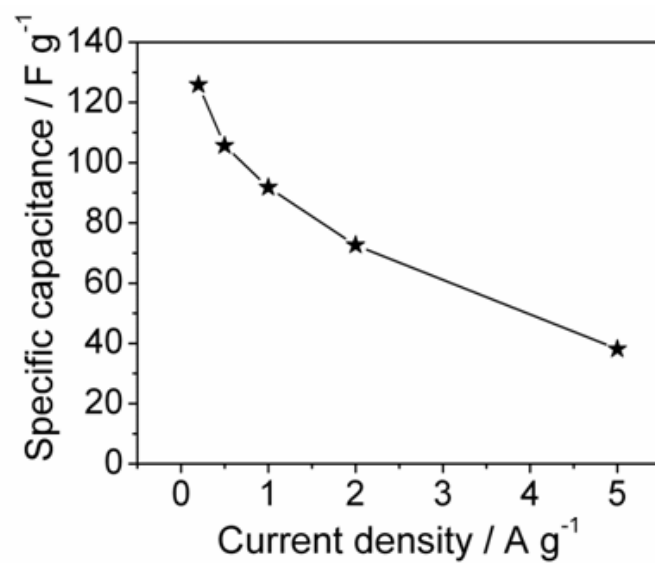

**Figure S3.** relationship between different current densities and specific capacitances of activated carbon in 1M LiClO<sub>4</sub> in PC, tested from -0.2~0.8 V vs Ag/AgCl.

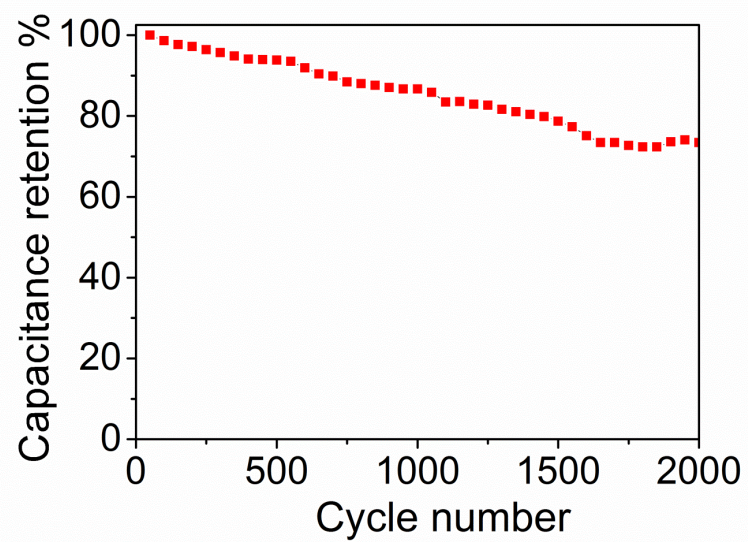

**Figure S4.** Capacitance retention of PANI-SWCNT material cycling test in 1M LiClO<sub>4</sub> in PC, tested from -0.2~0.8 V vs Ag/AgCl at a scan rate of 10 mV s<sup>-1</sup>.
